# Supplementary material for: ERMP1 Facilitates The Malignant Characteristics of Colorectal Cancer Cells through Modulating PI3K/AKT/β-Catenin Pathway and Localization of GRP78
Source: PubMed Central journal article supplement — Cell J. 2023 Jul 25;25(7):470–82. doi: 10.22074/CELLJ.2023.1982707.1188 (PMC10404360; doi:10.22074/cellj.2023.1982707.1188), 2023-07-25
Supplement: Cell-J-25-470-s01.pdf [file Cell-J-25-470-s01.pdf]

## Supplementary Information for

# ERMP1 Facilitates The Malignant Characteristics of Colorectal Cancer Cells through Modulating PI3K/AKT/ $\beta$ -Catenin Pathway and Localization of GRP78

Nasim Rahmani-Kukia, Ph.D.<sup>1</sup>, Mozhdeh Zamani, Ph.D.<sup>2\*</sup> , Pooneh Mokarram, Ph.D.<sup>3\*</sup> 

1. Department of Biochemistry, School of Medicine, Shiraz University of Medical Sciences, Shiraz, Iran

2. Autophagy Research Center, Shiraz University of Medical Sciences, Shiraz, Iran

3. Autophagy Research Center, Department of Biochemistry, School of Medicine, Shiraz University of Medical Sciences, Shiraz, Iran

**Table S1:** A list of gene specific primers used for reverse transcription-quantitative polymerase chain reaction (RT-qPCR)

| Gene name       | Primer sequence (5'-3')                               |
|-----------------|-------------------------------------------------------|
| <i>GAPDH</i>    | F: CGACCACTTTGTCAAGCTCA<br>R: AGGGGTCTACATGGCAACTG    |
| <i>C-MYC</i>    | F: CATAATCCTGTCCGTCCTCAAG<br>R: CGCACAAGAGTTCCGTAGC   |
| <i>CYCLIN D</i> | F: CATCCAGTGACAAACCATC<br>R: TTATAGTAGCGTATCGTAGGA    |
| <i>AKT</i>      | F: TTGTTATTGTGTATTATGTTGTTCA<br>R: AAGTGCTACCGTGGAGAG |
| <i>ERMP1</i>    | F: TCTTTTGGCACTTCAGCAC<br>R: CCCACCATCCACTAATACAAC    |

Received: 12/December/2022, Revised: 14/April/2023, Accepted: 22/May/2023

\*Corresponding Addresses: P.O.Box: 7134845794, Autophagy Research Center, Shiraz University of Medical Sciences, Shiraz, Iran

P.O.Box: 7134845794, Autophagy Research Center, Department of Biochemistry, School of Medicine, Shiraz University of Medical Sciences, Shiraz, Iran

Emails: mozamani@sums.ac.ir, mokarramp@sums.ac.ir

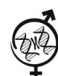

Royan Institute  
Cell Journal (Yakhteh)

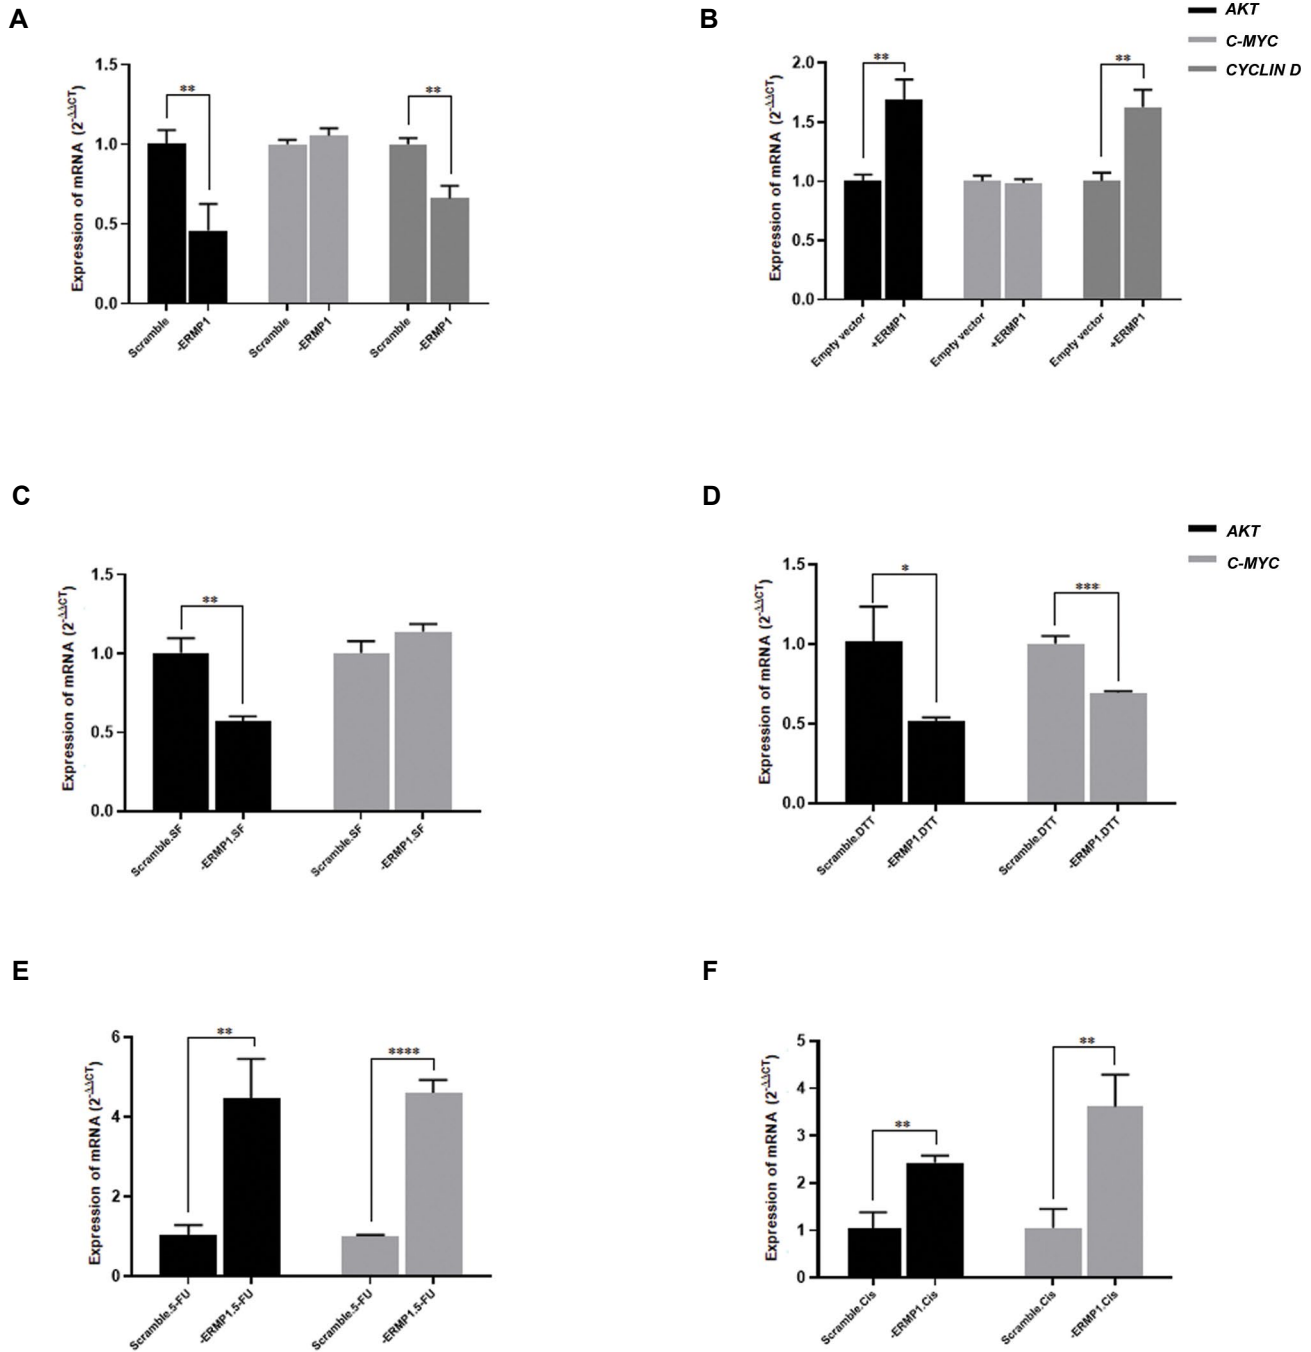

**Fig.S1:** Evaluation of the ERMP1 effect on *AKT*, *C-MYC* and *CYCLIN D* expression using RT-qPCR. **A.** Knock-down of *ERMP1* significantly affected the expression of *AKT* and *CYCLIN D* under normal condition. **B.** Overexpression of *ERMP1* considerably enhanced the expression of *AKT* and *CYCLIN D*. **C.** DTT treatment remarkably reduced the expression of *AKT* and *C-MYC* in comparison with its scramble control. **D, E.** *AKT* and *C-MYC* expressions were overexpressed following treatment with 5-FU and cisplatin in -*ERMP1* cells. Data are presented as the mean  $\pm$  SD, \*,  $P < 0.05$ , \*\*,  $P < 0.01$ , \*\*\*,  $P < 0.001$ , and \*\*\*\*,  $P < 0.0001$  vs. each scramble control or empty vector. Unpaired t test is applied.
